# Supplementary material for: Characterization of photocatalytic paints: a relationship between the photocatalytic properties – release of nanoparticles and volatile organic compounds
Source: Royal Society of Chemistry journal article supplement (doi:10.1039/c7en00467b), 2017-01-01
Supplement: c7en00467b1.pdf [file c7en00467b1.pdf]

## Supporting Information

| Sample state                         | Microscopy                               | Structural studies                                    | Photocatalysis                      | Chemical identification                         | Ageing                   | NPs release in the air        |
|--------------------------------------|------------------------------------------|-------------------------------------------------------|-------------------------------------|-------------------------------------------------|--------------------------|-------------------------------|
| Powders                              | SEM-EDS, TEM-EDS, cryo-TEM (shape, size) | XRD (anatase, rutile)                                 | EPR (free radicals generated)       | SEM-EDS TEM-EDS (elemental composition)         |                          |                               |
| Dispersion (powder 70%w/w and water) |                                          | SANS SAXS (dispersion, size in liquid state, coating) |                                     |                                                 |                          |                               |
| Paints applied on substrate          | SEM-EDS (shape, size)                    |                                                       | PTRMS (VOCs degraded and generated) | XPS (chemical bond) EDS (elemental composition) | UV Water spray (outdoor) | Abrasion, ELPI (granulometry) |

SI 1: Table summarizing all the characterization techniques used to study powders, dispersions and paints applied on substrates.

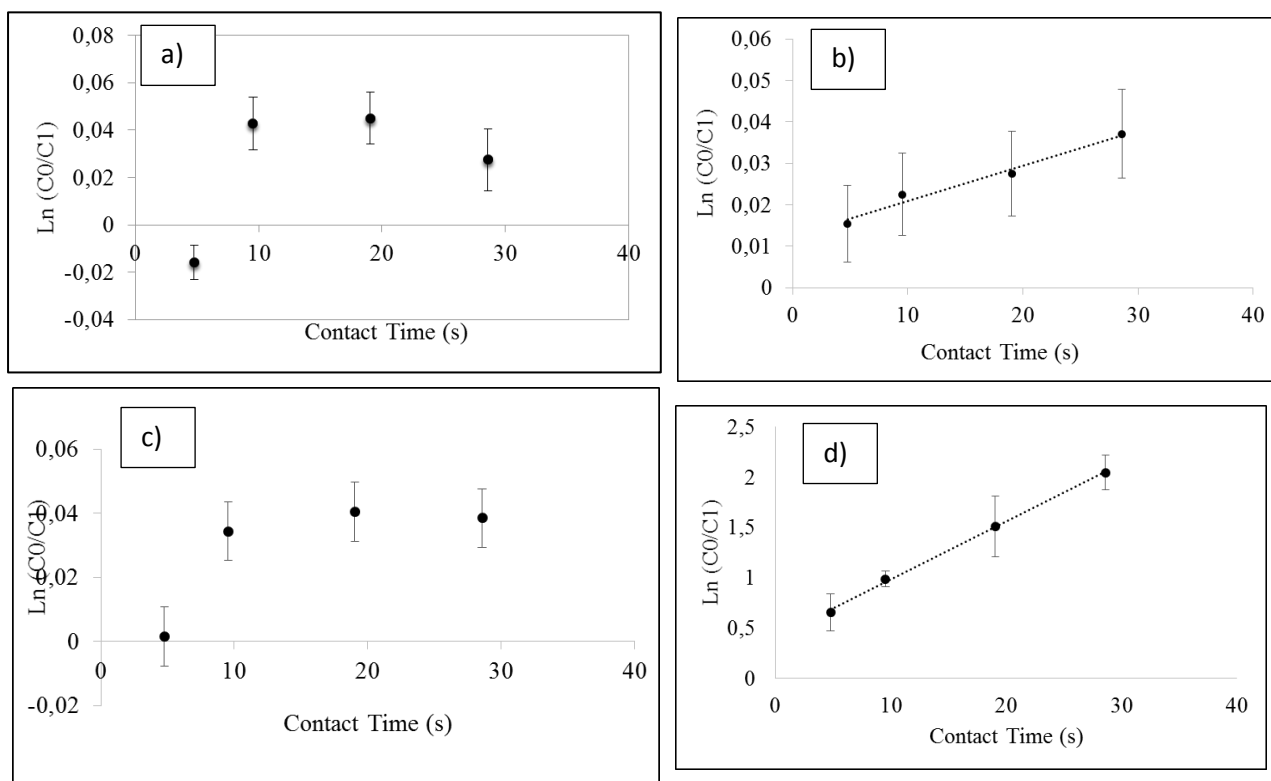

SI 2: Determination of the kinetic constant of the xylene decay as a function of the contact time between samples and xylene gas for a) non-aged PM1 paint, b) non-aged PM2 paint, c) aged PM1 paint and d) aged PM2 paint.
